# Supplementary material for: DNA Methylation of TGFβ Target Genes: Epigenetic Control of TGFβ Functional Duality in Liver Cancer
Source: MDPI journal article supplement (doi:10.3390/cells10092207), 2021-08-26
Supplement: s1 [file s1]

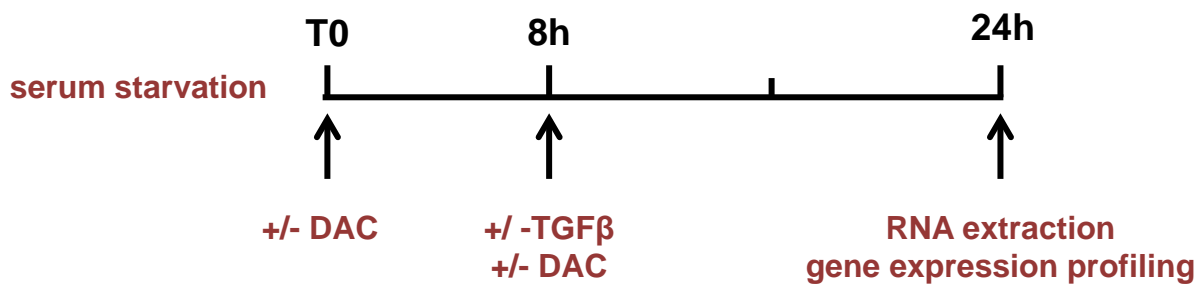

**Supplementary Figure S1:** Summary of the experimental study design.

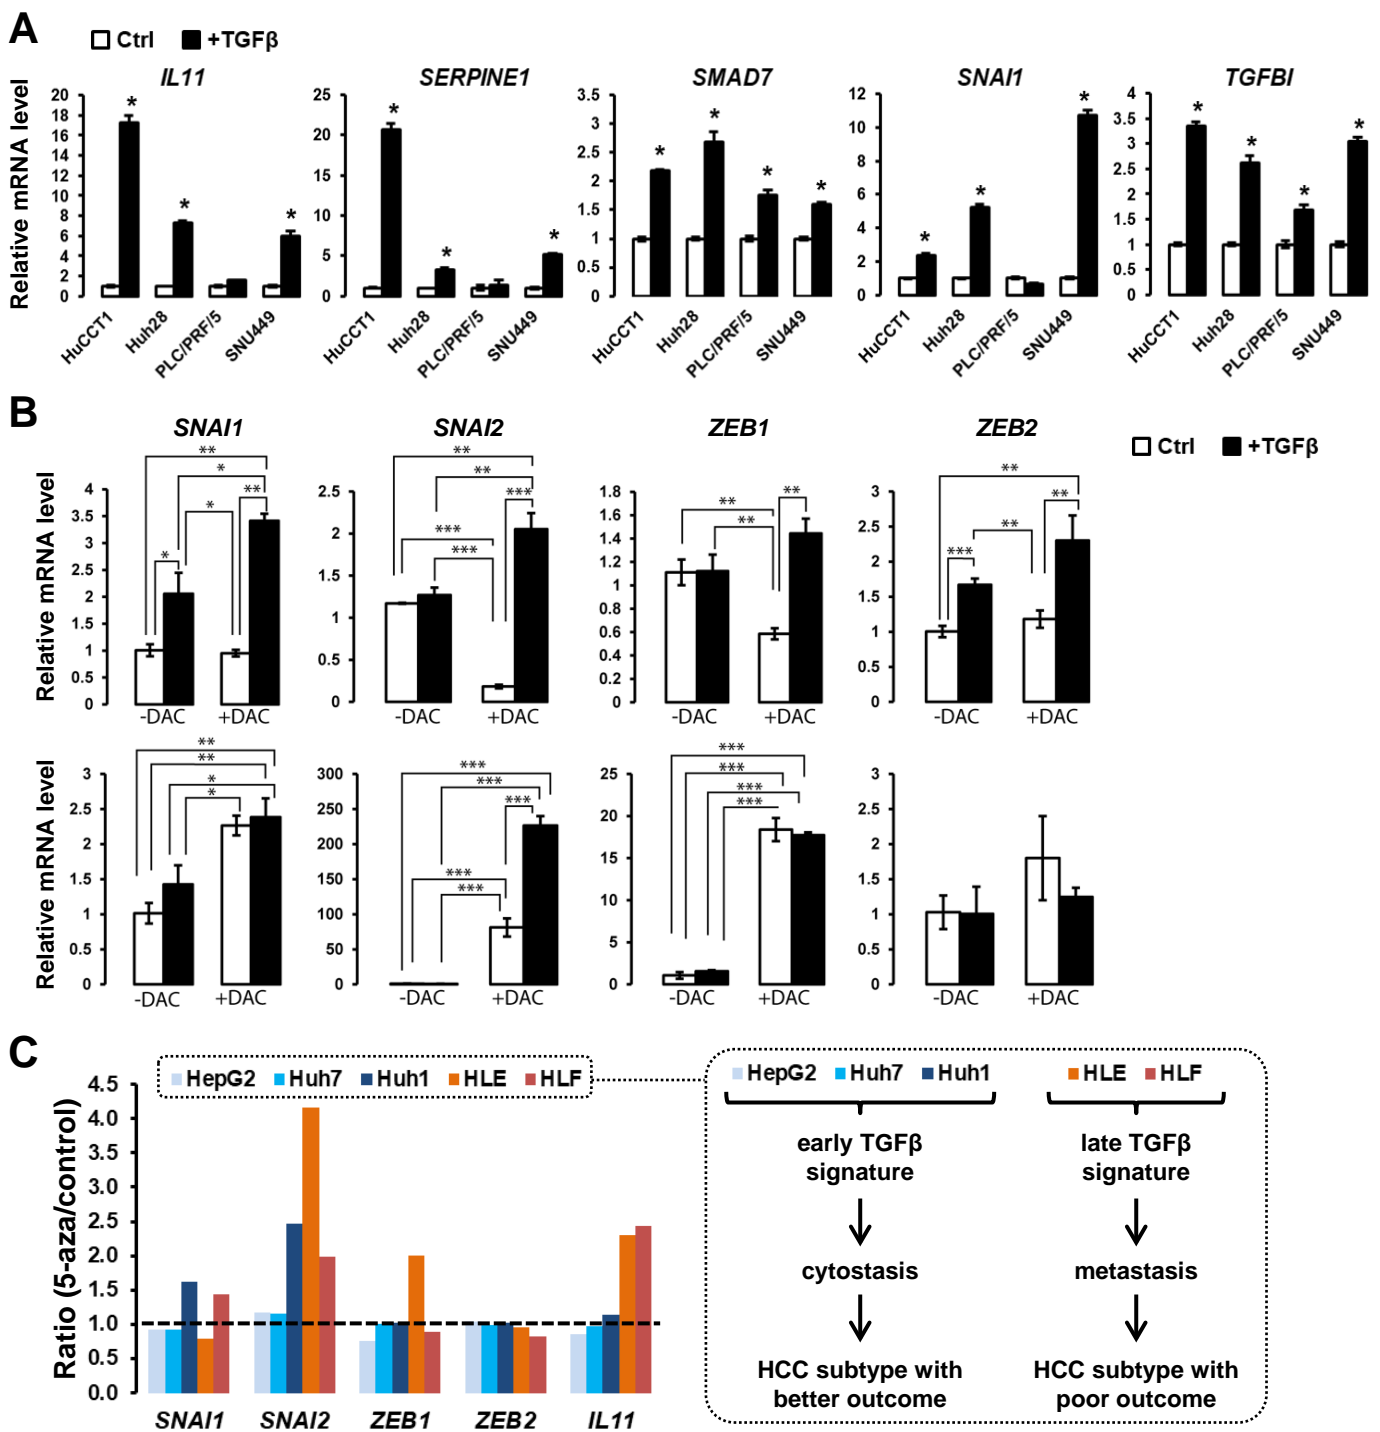

**Supplementary Figure S2:** Decitabine induces the expression of EMT-associated transcription factors in aggressive HCC cell lines. **(A)** RT-qPCR validation of TGFβ-responsive genes in PLC/PRF/5, HuCCT1, Huh28 and SNU449 cells (1ng/mL TGFβ; 16hrs). **(B)** RT-qPCR validation in Hep3B (upper panels) and HuH6 (lower panels) cells treated with TGFβ (black bars) versus control (white bars) in absence (left 2 bars, -DAC) or presence (right 2 bars, +DAC) of decitabine. Cells were treated alone or in combination with 1ng/mL TGFβ1 and 100μM decitabine (DAC) for 24hrs. \* P<0.05, \*\* P<0.01, \*\*\* P<0.001 (+/-TGFβ, +/- DAC). **(C)** Meta-analysis of gene expression in HCC cells exposed to 5-azacitidine for 3 days (GSE112788). Shown are the gene expression ratios 5-azacitidine versus control. Right panel: features of HCC cells based on Coulouarn et al., *Hepatology*, 2008 [11].

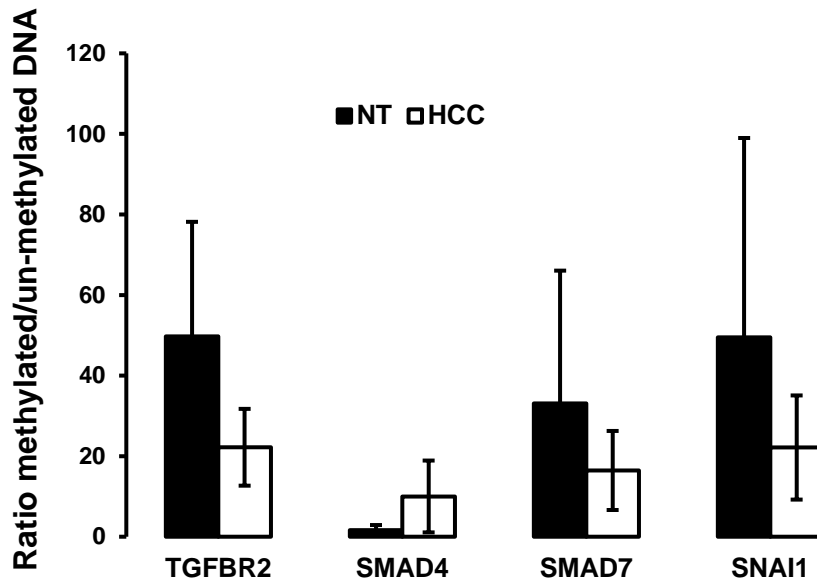

**Supplementary Figure S 3:** Methylation profiles of TGF $\beta$ -associated genes in human liver cancer. Ratio of methylated/un-methylated DNA in each experimental group (HCC tumors versus NT). Data are represented as mean  $\pm$  sem ( $P > 0.05$ ).
